# Supplementary material
Source: publisher figshare collection journal article supplement (https://asha.figshare.com/articles/dataset/_/12985955)
Supplement: Supplementary file 1 [file 1]

**Supplemental Material S1.** Sampling matrix containing number of participants fulfilling criteria (gender, age, hearing device, psychological symptoms) to obtain maximum variation sampling

|                                     | <b>60-69 years</b> | <b>70 + years</b> | <b>Male</b> | <b>Female</b> | <b>Cochlear implant</b> | <b>Hearing aid</b> |
|-------------------------------------|--------------------|-------------------|-------------|---------------|-------------------------|--------------------|
| <b>DASS Depression criteria met</b> | 6                  | 6                 | 7           | 5             | 3                       | 9                  |
| <b>DASS Anxiety criteria met</b>    | 4                  | 3                 | 3           | 4             | 3                       | 4                  |
| <b>DASS Stress criteria met</b>     | 4                  | 3                 | 2           | 5             | 3                       | 4                  |
| <b>PSQ criteria met</b>             | 1                  | 3                 | 1           | 3             | 1                       | 3                  |
| <b>Cochlear implant</b>             | 3                  | 1                 | 2           | 2             |                         |                    |
| <b>Hearing aid</b>                  | 5                  | 5                 | 6           | 4             |                         |                    |
| <b>Male</b>                         | 5                  | 3                 |             |               |                         |                    |
| <b>Female</b>                       | 3                  | 3                 |             |               |                         |                    |
