# Supplementary material
Source: publisher figshare collection journal article supplement (https://asha.figshare.com/articles/dataset/_/12985955)
Supplement: Supplementary file 2 [file 1]

**Supplemental Material S2.** Interview topic guide containing initial and follow-up open-ended questions

| Topic                                                | Key question                                                                                                       | Prompts / Tasks                                                                                                                                                                                                                                                                                                                                                                                                                                                                                                                                       | Phrases / Reminders          |
|------------------------------------------------------|--------------------------------------------------------------------------------------------------------------------|-------------------------------------------------------------------------------------------------------------------------------------------------------------------------------------------------------------------------------------------------------------------------------------------------------------------------------------------------------------------------------------------------------------------------------------------------------------------------------------------------------------------------------------------------------|------------------------------|
| <i>Experience:</i><br>Hearing<br>impairment          | What are the perspectives of living with hearing impairment for participants with comorbid psychological symptoms? | <ul style="list-style-type: none"> <li>• What is your experience with hearing loss? <ul style="list-style-type: none"> <li>○ Impacts</li> <li>○ Perceived disability</li> </ul> </li> <li>• How do you feel about your hearing loss? <ul style="list-style-type: none"> <li>○ Thoughts</li> <li>○ Emotions</li> <li>○ Attitudes</li> <li>○ Beliefs</li> </ul> </li> <li>• How do you cope with your hearing loss?</li> <li>• How do you think your experience of hearing loss is different to those without <i>depression/anxiety etc</i>?</li> </ul> | How is it different for you? |
| <i>Experience:</i><br>Audiological<br>rehabilitation | What is the lived experience of audiological rehabilitation for older adults with comorbid psychological symptoms? | <ul style="list-style-type: none"> <li>• Tell me about your hearing rehabilitation. <ul style="list-style-type: none"> <li>○ Devices</li> <li>○ Anyone with you at appointment</li> <li>○ Thoughts / feelings throughout</li> <li>○ Appointments</li> <li>○ Challenges</li> <li>○ Successes</li> </ul> </li> </ul>                                                                                                                                                                                                                                    | How is it different for you? |

| Topic                               | Key question                                                                                                     | Prompts / Tasks                                                                                                                                                                                                                                                                                                                                                                                                                                                                                                                                                                                                                                                                                                                                                                                                                                                                                                          | Phrases / Reminders                                                                                                                                        |
|-------------------------------------|------------------------------------------------------------------------------------------------------------------|--------------------------------------------------------------------------------------------------------------------------------------------------------------------------------------------------------------------------------------------------------------------------------------------------------------------------------------------------------------------------------------------------------------------------------------------------------------------------------------------------------------------------------------------------------------------------------------------------------------------------------------------------------------------------------------------------------------------------------------------------------------------------------------------------------------------------------------------------------------------------------------------------------------------------|------------------------------------------------------------------------------------------------------------------------------------------------------------|
| <i>Experience:</i><br>Mental health | What psychological symptoms or disorders do we see in participants with hearing impairment?                      | <p><i>Initial question will be guided by history form and questionnaires already collected from participant</i></p> <p>Reported diagnosis:</p> <ul style="list-style-type: none"> <li>• Tell me about your experience with <i>disorder</i>. <ul style="list-style-type: none"> <li>○ Symptoms</li> <li>○ Onset, duration, remission</li> <li>○ Diagnosis and treatments</li> </ul> </li> </ul> <p>OR</p> <p>Psychological symptoms on screening:</p> <ul style="list-style-type: none"> <li>• Tell me about your experiences with <i>symptoms</i>. <ul style="list-style-type: none"> <li>○ Onset, duration</li> <li>○ Help sought, treatments</li> </ul> </li> <li>• Do you see any relationship between your hearing loss and your mental health? Do you think they might be linked?</li> <li>• How do you feel about discussing mental health with others? (e.g. family / friends / health care providers)</li> </ul> | <p>Take some time to think...</p> <p>You don't need to go into a lot of detail here....</p> <p>That might be something to talk to your doctor about...</p> |
| <i>Experience:</i><br>Audiologists  | What is the experience of conversations with audiologists for older adults with comorbid psychological symptoms? | <ul style="list-style-type: none"> <li>• Tell me about your relationship with your audiologist. <ul style="list-style-type: none"> <li>○ One clinician or multiple</li> <li>○ Trust / comfort</li> <li>○ Communication</li> </ul> </li> <li>• Tell me about any times you talked about thoughts, feelings or emotions with your audiologist. <ul style="list-style-type: none"> <li>○ How did this come up?</li> <li>○ What was discussed?</li> <li>○ How did this make you feel?</li> </ul> </li> <li>• If you didn't discuss thoughts or emotions with your audiologist, why not?</li> <li>• How do you feel about audiologists addressing mental wellbeing related to your hearing loss?</li> </ul>                                                                                                                                                                                                                   |                                                                                                                                                            |

| Topic                              | Key question                                                                                                             | Prompts / Tasks                                                                                                                                                                                                                                                                                                                                                                                                                                                                                                                                                                                                                                                                                        | Phrases / Reminders |
|------------------------------------|--------------------------------------------------------------------------------------------------------------------------|--------------------------------------------------------------------------------------------------------------------------------------------------------------------------------------------------------------------------------------------------------------------------------------------------------------------------------------------------------------------------------------------------------------------------------------------------------------------------------------------------------------------------------------------------------------------------------------------------------------------------------------------------------------------------------------------------------|---------------------|
| <i>Experience:</i><br>Audiologists | What is the experience of conversations with audiologists for older adults with comorbid psychological symptoms?         | <ul style="list-style-type: none"> <li>• Tell me about your relationship with your audiologist. <ul style="list-style-type: none"> <li>○ One clinician or multiple</li> <li>○ Trust / comfort</li> <li>○ Communication</li> </ul> </li> <li>• Tell me about any times you talked about thoughts, feelings or emotions with your audiologist. <ul style="list-style-type: none"> <li>○ How did this come up?</li> <li>○ What was discussed?</li> <li>○ How did this make you feel?</li> </ul> </li> <li>• If you didn’t discuss thoughts or emotions with your audiologist, why not?</li> <li>• How do you feel about audiologists addressing mental wellbeing related to your hearing loss?</li> </ul> |                     |
| <i>Experience:</i><br>Outcomes     | What are the perspectives of audiological rehabilitation outcomes for older adults with comorbid psychological symptoms? | <ul style="list-style-type: none"> <li>• How have things changed things in your life after experiencing hearing rehabilitation? <ul style="list-style-type: none"> <li>○ Hearing</li> <li>○ Activities</li> <li>○ Participation</li> <li>○ Thoughts / feelings</li> </ul> </li> <li>• Has hearing rehabilitation changed your psychological symptoms?</li> </ul>                                                                                                                                                                                                                                                                                                                                       |                     |

| Topic           | Key question                                                                                              | Prompts / Tasks                                                                                                                                                                                                                                                                                                                                                                                                                                                                                                                                                    | Phrases / Reminders |
|-----------------|-----------------------------------------------------------------------------------------------------------|--------------------------------------------------------------------------------------------------------------------------------------------------------------------------------------------------------------------------------------------------------------------------------------------------------------------------------------------------------------------------------------------------------------------------------------------------------------------------------------------------------------------------------------------------------------------|---------------------|
| <i>Opinions</i> | What do older adults with comorbid psychological symptoms think will improve audiological rehabilitation? | <ul style="list-style-type: none"><li>• What could have been changed in your hearing rehabilitation that would have better supported your mental wellbeing?<ul style="list-style-type: none"><li>○ What was done well or that helped?</li></ul></li><li>• What could your audiologist have done?<ul style="list-style-type: none"><li>○ What did they do well?</li></ul></li><li>• What else would make the rehabilitation experience the best it can be?</li><li>• Is there anything else that you would like to add that we haven't already discussed?</li></ul> |                     |
